# Supplementary material
Source: ML conference proceedings conference paper supplement (https://proceedings.neurips.cc/paper_files/paper/2009/hash/94f6d7e04a4d452035300f18b984988c-Abstract.html)
Supplement: Supplementary file 1 [file 94f6d7e04a4d452035300f18b984988c-Supplemental.zip]

---

# Supplementary Material for “Conditional Random Fields with High-Order Features for Sequence Labeling”

---

|                                                                                                                       |                                                                        |                                                                                                        |
|-----------------------------------------------------------------------------------------------------------------------|------------------------------------------------------------------------|--------------------------------------------------------------------------------------------------------|
| <b>Nan Ye</b><br>Department of Computer Science<br>National University of Singapore<br>{yenan, leews}@comp.nus.edu.sg | <b>Wee Sun Lee</b><br>DSO National Laboratories<br>chaileon@dso.org.sg | <b>Hai Leong Chieu</b><br>Singapore MIT Alliance<br>National University of Singapore<br>dwu@nus.edu.sg |
|-----------------------------------------------------------------------------------------------------------------------|------------------------------------------------------------------------|--------------------------------------------------------------------------------------------------------|

### An example illustrating the computation of the forward variable and marginal

Assume  $\mathbf{x}$  is “Peter goes to Britain and France annually.”. Assume there are 9 binary features defined by boolean predicates as in Table 1, and each  $\lambda_i = 1$ . The label set is  $\{P, O, L\}$  where  $P$  represents *Person*,  $L$  represents *Location* and  $O$  represents *Others*.

|     |                                  |
|-----|----------------------------------|
| $i$ | $f_i(\mathbf{x}, \mathbf{y}, j)$ |
| 1   | $x_j = Peter \wedge y_j = P$     |
| 2   | $x_j = goes \wedge y_j = O$      |
| 3   | $x_j = to \wedge y_j = O$        |
| 4   | $x_j = Britain \wedge y_j = L$   |
| 5   | $x_j = and \wedge y_j = O$       |
| 6   | $x_j = France \wedge y_j = L$    |
| 7   | $x_j = annually \wedge y_j = O$  |
| 8   | $x_j = . \wedge y_j = O$         |
| 9   | $y_{j-2}y_{j-1}y_j = LOL$        |

Table 1: List of features.

Table 2 shows the sum of the weights for features with the same label pattern at each position.

| $t \setminus \mathbf{z}$ | P | O | L | LOL |
|--------------------------|---|---|---|-----|
| 0                        | 0 | 0 | 0 | 0   |
| 1                        | 1 | 0 | 0 | 0   |
| 2                        | 0 | 1 | 0 | 0   |
| 3                        | 0 | 1 | 0 | 0   |
| 4                        | 0 | 0 | 1 | 0   |
| 5                        | 0 | 1 | 0 | 0   |
| 6                        | 0 | 0 | 1 | 1   |
| 7                        | 0 | 1 | 0 | 0   |
| 8                        | 0 | 1 | 0 | 0   |

Table 2:  $\sum_{i: \mathbf{z}^i = \mathbf{z}} \lambda_i g_i(x, t)$

We have  $\mathcal{P} = \{\epsilon, P, O, L, LO\}$ , and  $\mathcal{S} = \{\epsilon P, O, L, OL\}$ . The tables for  $\ln \alpha_{\mathbf{x}}$  and  $\ln \beta_{\mathbf{x}}$  are shown in Table 3 and Table 4 respectively.

| $t \setminus \mathbf{p}^i$ | $\epsilon$ | P         | O         | L         | LO        |
|----------------------------|------------|-----------|-----------|-----------|-----------|
| 0                          | 0.00       | $-\infty$ | $-\infty$ | $-\infty$ | $-\infty$ |
| 1                          | $-\infty$  | 1.00      | 0.00      | 0.00      | $-\infty$ |
| 2                          | $-\infty$  | 1.55      | 2.31      | 1.55      | 1.00      |
| 3                          | $-\infty$  | 3.10      | 3.87      | 3.12      | 2.55      |
| 4                          | $-\infty$  | 4.65      | 4.42      | 5.65      | 3.10      |
| 5                          | $-\infty$  | 6.21      | 6.35      | 6.21      | 6.65      |
| 6                          | $-\infty$  | 7.76      | 7.52      | 9.21      | 6.21      |
| 7                          | $-\infty$  | 9.60      | 9.45      | 9.59      | 10.21     |
| 8                          | $-\infty$  | 11.14     | 11.91     | 11.14     | 10.59     |

Table 3:  $\ln \alpha_{\mathbf{x}}(t, \mathbf{p}^i)$

| $t \setminus \mathbf{s}^i$ | $\epsilon$ | P         | O         | L         | OL        |
|----------------------------|------------|-----------|-----------|-----------|-----------|
| 1                          | $-\infty$  | 12.14     | 10.91     | 11.14     | 9.59      |
| 2                          | $-\infty$  | 9.59      | 10.36     | 9.59      | 9.04      |
| 3                          | $-\infty$  | 8.04      | 7.90      | 8.04      | 8.66      |
| 4                          | $-\infty$  | 6.21      | 5.97      | 7.66      | 4.65      |
| 5                          | $-\infty$  | 4.65      | 4.80      | 4.65      | 5.10      |
| 6                          | $-\infty$  | 3.10      | 2.87      | 4.10      | 1.55      |
| 7                          | $-\infty$  | 1.55      | 2.31      | 1.55      | 1.00      |
| 8                          | $-\infty$  | 0.00      | 1.00      | 0.00      | $-\infty$ |
| 9                          | 0.00       | $-\infty$ | $-\infty$ | $-\infty$ | $-\infty$ |

Table 4:  $\ln \beta_{\mathbf{x}}(t, \mathbf{s}^i)$

We illustrate the computation of  $\alpha_{\mathbf{x}}$  with  $\alpha_{\mathbf{x}}(6, L)$ . The condition  $(\mathbf{p}^i, y) : \mathbf{p}^k \leq_s^{\mathbf{p}} \mathbf{p}^i y$  with  $\mathbf{p}^k = L$  gives us the following 5 label sequences as  $(\mathbf{p}^i, y) : \{\epsilon L, PL, OL, LL, LOL\}$ .

$$\begin{aligned}
& \alpha_{\mathbf{x}}(6, L) \\
&= \alpha_{\mathbf{x}}(5, \epsilon) \Psi_{\mathbf{x}}^{\mathbf{p}}(6, L) + \alpha_{\mathbf{x}}(5, P) \Psi_{\mathbf{x}}^{\mathbf{p}}(6, PL) + \alpha_{\mathbf{x}}(5, O) \Psi_{\mathbf{x}}^{\mathbf{p}}(6, OL) + \\
& \alpha_{\mathbf{x}}(5, L) \Psi_{\mathbf{x}}^{\mathbf{p}}(6, LL) + \alpha_{\mathbf{x}}(5, LO) \Psi_{\mathbf{x}}^{\mathbf{p}}(6, LOL) \\
&= 0 \Psi_{\mathbf{x}}^{\mathbf{p}}(6, L) + \alpha_{\mathbf{x}}(5, P)e + \alpha_{\mathbf{x}}(5, O)e + \alpha_{\mathbf{x}}(5, L)e + \alpha_{\mathbf{x}}(5, LO)e^2.
\end{aligned}$$

We also have

$$\begin{aligned}
Z_{\mathbf{x}} &= \alpha_{\mathbf{x}}(8, \epsilon) + \alpha_{\mathbf{x}}(8, P) + \alpha_{\mathbf{x}}(8, O) + \alpha_{\mathbf{x}}(8, L) + \alpha_{\mathbf{x}}(8, LO) \\
&= \beta_{\mathbf{x}}(1, \epsilon) + \beta_{\mathbf{x}}(1, P) + \beta_{\mathbf{x}}(1, O) + \beta_{\mathbf{x}}(1, L) + \beta_{\mathbf{x}}(1, LO) \\
&= e^{12.696}.
\end{aligned}$$

The table for  $P(\mathbf{y}_{t-|\mathbf{z}^i|+1:t} = \mathbf{z}^i | \mathbf{x})$  is shown in Table 5.

| $t \setminus \mathbf{z}^i$ | P     | O     | L     | LOL   |
|----------------------------|-------|-------|-------|-------|
| 1                          | 0.576 | 0.212 | 0.212 | 0.000 |
| 2                          | 0.212 | 0.576 | 0.212 | 0.000 |
| 3                          | 0.212 | 0.576 | 0.212 | 0.026 |
| 4                          | 0.160 | 0.160 | 0.680 | 0.083 |
| 5                          | 0.160 | 0.681 | 0.160 | 0.007 |
| 6                          | 0.160 | 0.160 | 0.681 | 0.391 |
| 7                          | 0.212 | 0.576 | 0.212 | 0.007 |
| 8                          | 0.212 | 0.576 | 0.212 | 0.083 |

Table 5:  $P(\mathbf{y}_{t-|\mathbf{z}^i|+1:t} = \mathbf{z}^i | \mathbf{x})$

We illustrate the computation of  $P(\mathbf{y}_{4:6} = LOL|\mathbf{x})$  from the forward and backward variables. Observe that there is only one way to satisfy the condition  $(i, j) : \mathbf{z}_{1:|z|-1} \leq^s \mathbf{p}^i, \mathbf{z}_{2:|z|} \leq^p \mathbf{s}^j$  with  $\mathbf{z} = LOL$ . Hence,

$$\begin{aligned} P(\mathbf{y}_{4:6} = LOL|\mathbf{x}) &= \frac{\alpha_{bx}(5, LO)\beta_{\mathbf{x}}(5, OL)O_x(6, LO, OL, LOL)}{Z_{\mathbf{x}}W_{\mathbf{x}}} \\ &= \frac{\alpha_{\mathbf{x}}(5, LO)\beta_{\mathbf{x}}(5, OL)e^1}{Z_{\mathbf{x}}e^1}. \end{aligned}$$
